# Supplementary material for: Structure design and wireless transmission application of hybrid nanogenerators for swinging mechanical energy and solar energy harvesting
Source: Royal Society of Chemistry journal article supplement (doi:10.1039/d2nr02833f), 2022-01-01
Supplement: d2nr02833f1.pdf [file d2nr02833f1.pdf]

Electronic Supporting Information

**Structure Design and Wireless Transmission Application of Hybrid  
Nanogenerator for Swinging Mechanical Energy and Solar Energies Harvesting**

Huijie Shi#, Haowei Lu#, Xu Liu, Xiaobing Wang, Yonghui Wu\*, Haiwu Zheng\*

*#These authors contribute equal to this work.*

*Henan Province Engineering Research Center of Smart Micro-nano, Sensing Technology and  
Application, School of Physics and Electronics, Henan University,  
Kaifeng 475004, P. R. China.*

*\*Correspondence to: Y. H. Wu (defey@vip.henu.edu.cn), H. W. Zheng (zhenghaiw@ustc.edu).*

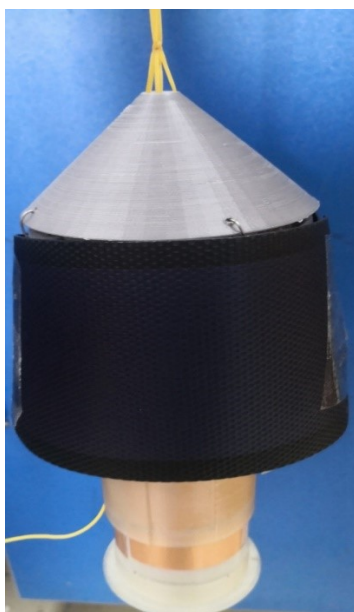

**Fig. S1** Photograph of hybrid nanogenerator.

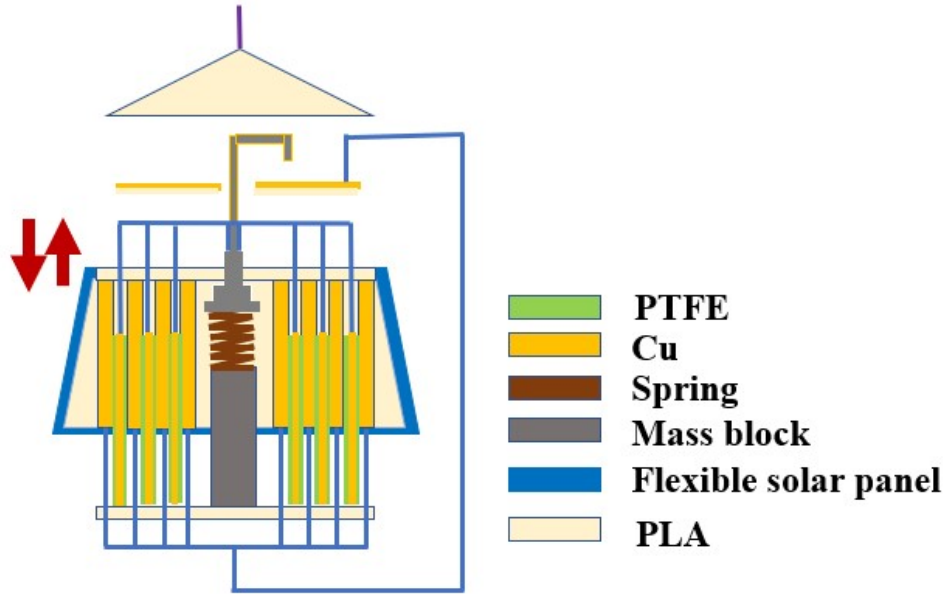

**Fig. S2** Sectional view of hybrid generator.

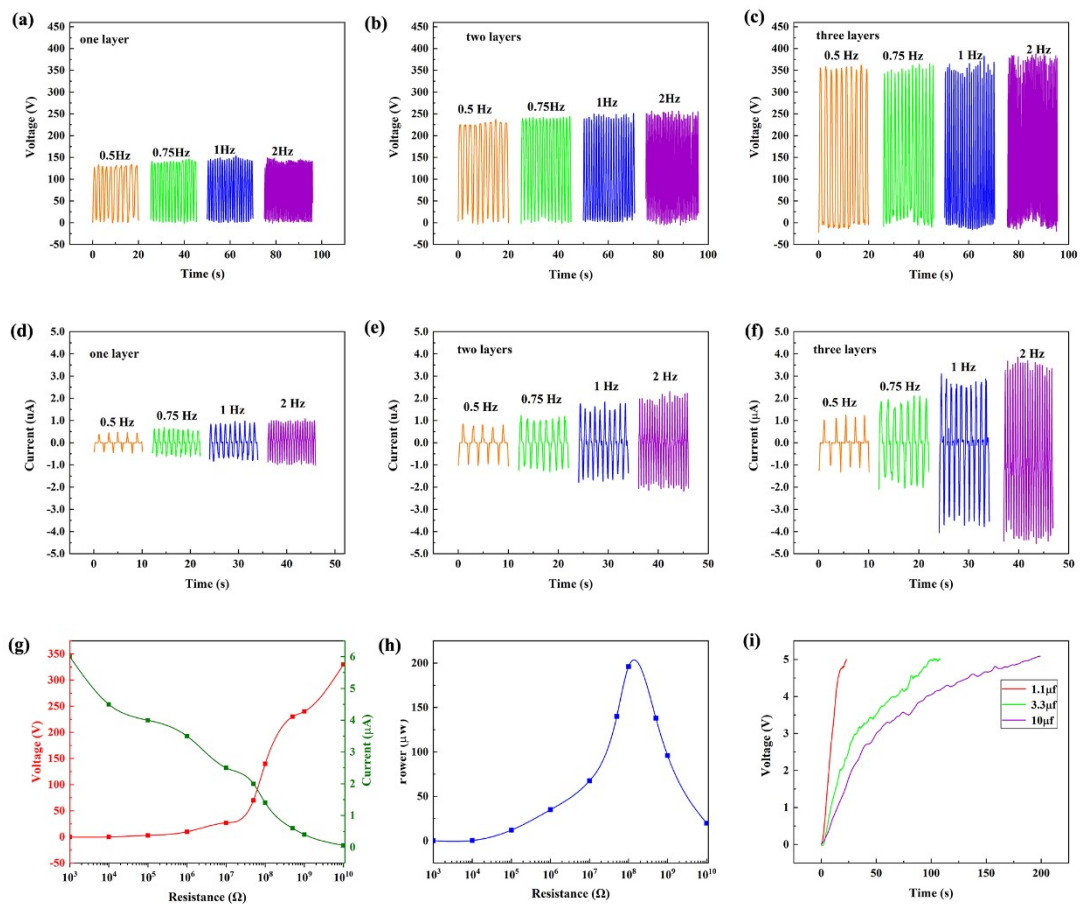

**Fig. S3** Evaluating the energy collection performance of TENG device under different layers and frequencies. (a-f)  $V_{oc}$  and  $I_{sc}$  at different frequencies under the structure of the TENG with one layer, two and three layers. (g-h) the output voltage, the output

current and the output power of the TENG with different loads under 2 Hz working frequency. (i) The charging curves of the capacitors with different capacitance by TENG at 2 Hz.

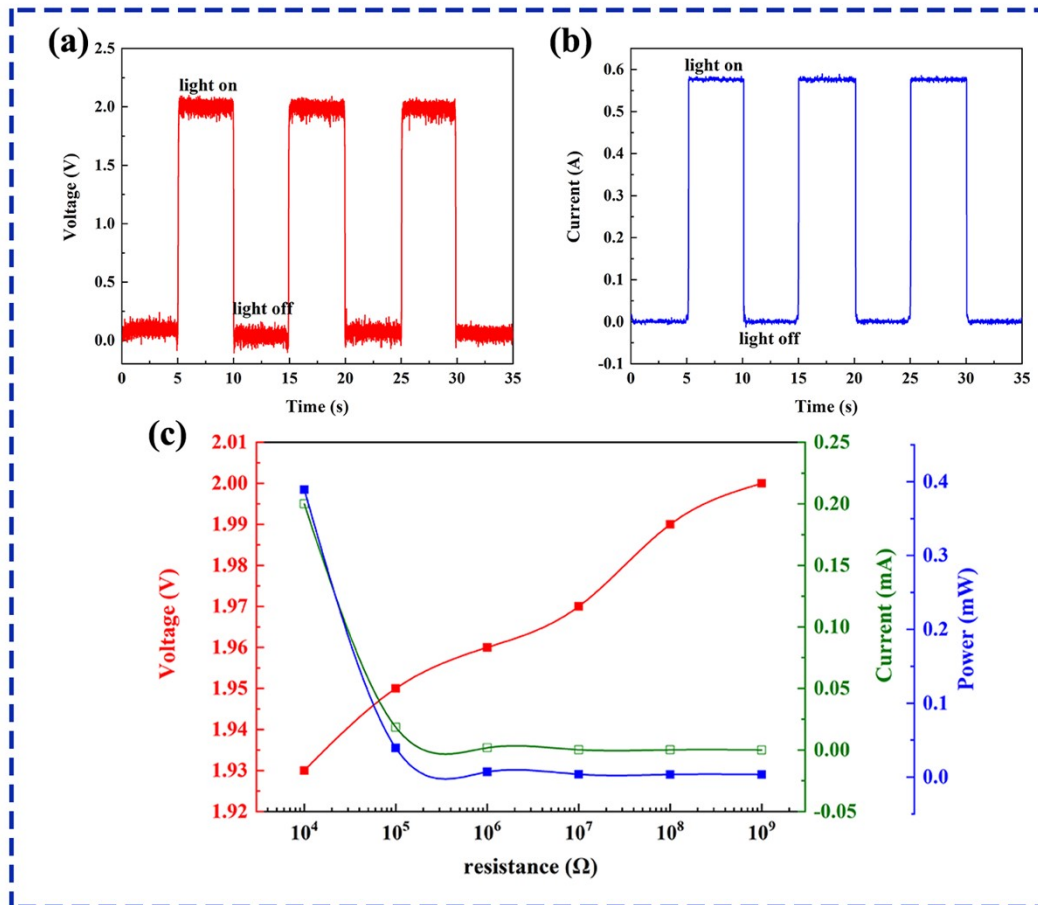

**Fig. S4** The (a)  $V_{oc}$  and (b)  $I_{sc}$  of commercial flexible photovoltaic cell (c) The output voltage, current and power of photovoltaic cell varying with different loads.

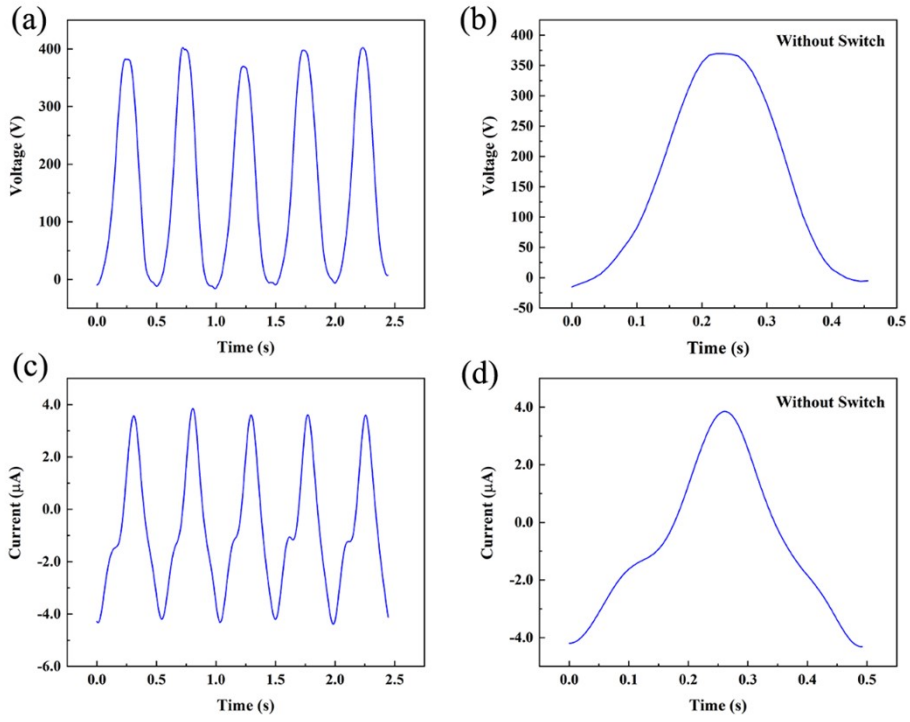

**Fig. S5** (a) The  $V_{oc}$  waveform of the TENG without integrated mechanical switch and (b) its enlarged view (c)  $I_{sc}$  waveform and (d) its enlarged view.

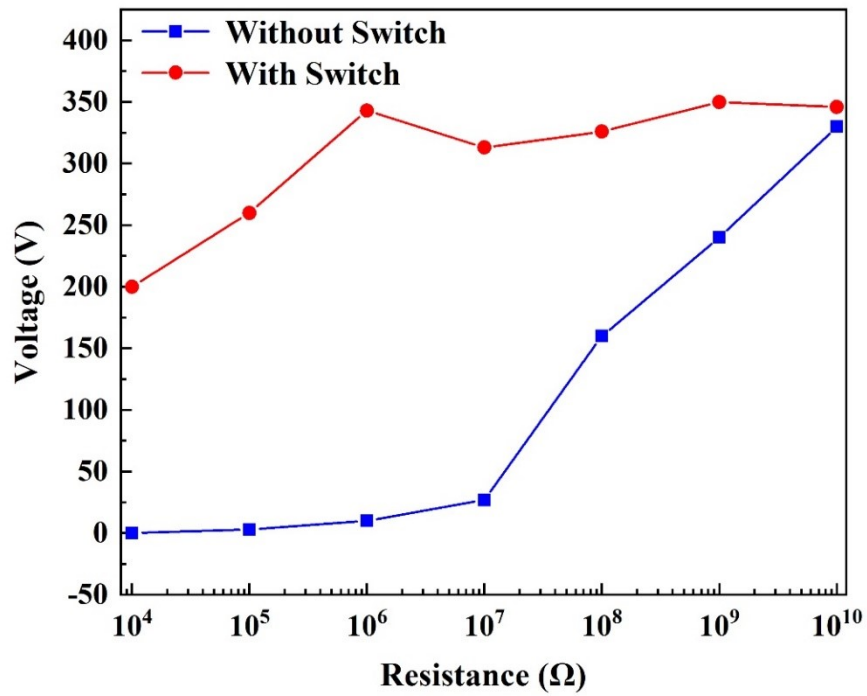

**Fig. S6** Voltage comparison of TENG with and without integrated mechanical switch.

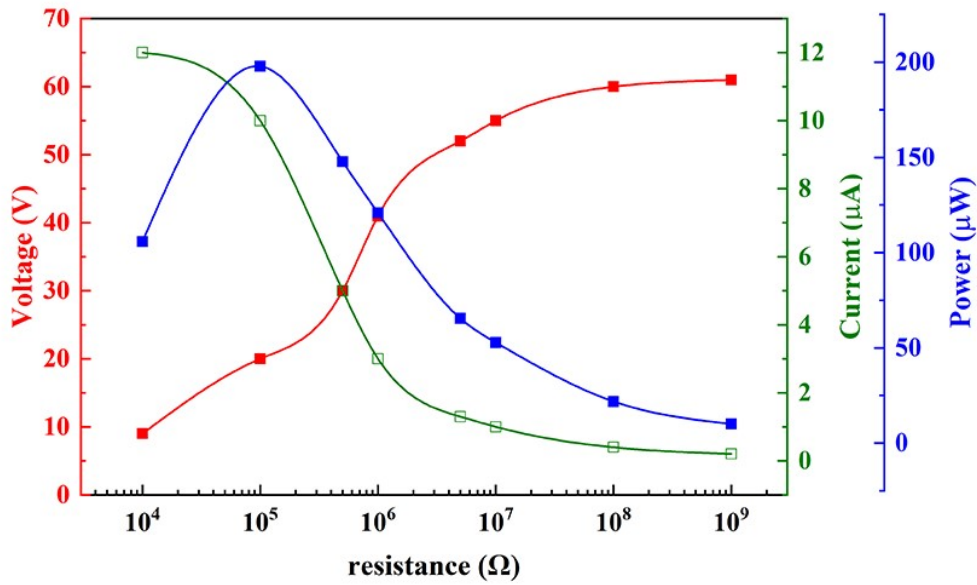

**Fig. S7** The output voltage, current, and instantaneous power outputs of TENG dependence on different load resistance ranging from  $10^4$  to  $10^9 \Omega$ .

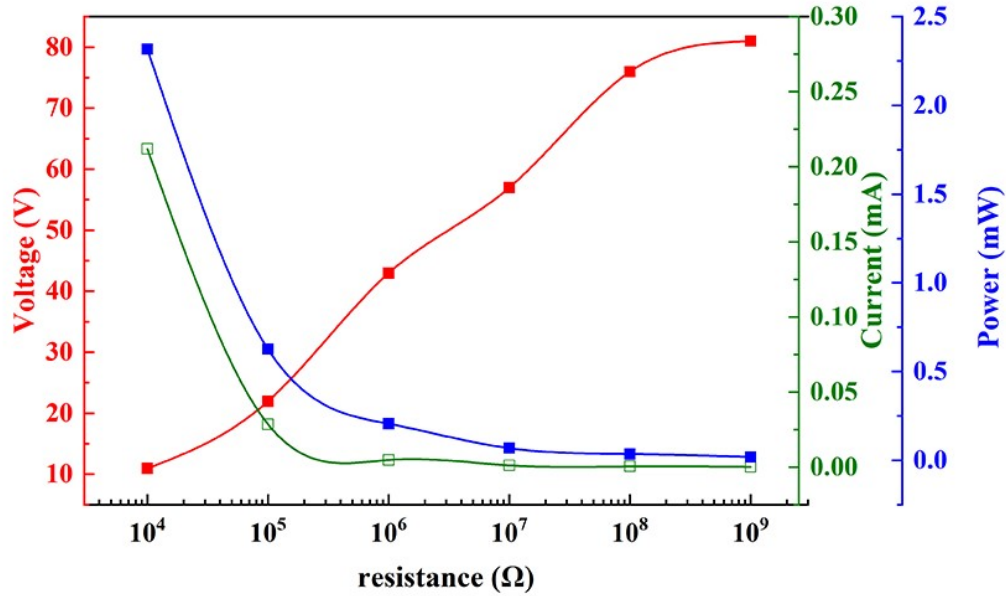

**Fig. S8** The output voltage, current, and instantaneous power outputs of hybrid generator dependence on different load resistance ranging from  $10^4$  to  $10^9 \Omega$ .

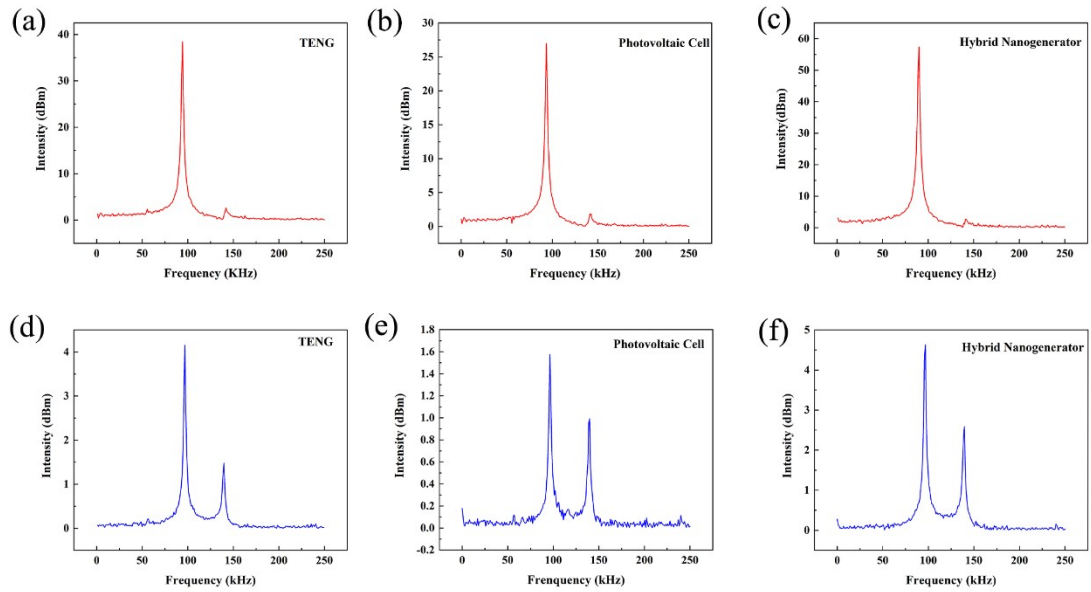

**Fig. S9** (a-c) The fast Fourier transform (FFT) spectrum of the emitter and (d-f) receiver coil ends of the TENG, photovoltaic cell and hybrid nanogenerator at 2 Hz.

### Supporting Movies

Movie S1. The 8 green LEDs can be easily lit up without any external electrical source based on wireless systems.

Movie S2. Hybrid nanogenerator acting as a power source can easily drive a commercial temperature-humidity meter wirelessly.
